# Supplementary material for: Europium ions modulated room temperature phosphorescence in dye-encapsulated MOFs for dual-modal fluorescence-afterglow
Source: Royal Society of Chemistry journal article supplement (doi:10.1039/d4tc03221g), 2024-11-12
Supplement: d4tc03221g2.pdf [file d4tc03221g2.pdf]

## Supporting Information

### **Europium ions modulated room temperature phosphorescence in dye-encapsulated MOFs for dual-modal fluorescence-afterglow**

Jiabo Chen<sup>a</sup>, Renrui Sun<sup>a</sup>, Wanjun Yang<sup>a</sup>, Feifei Xing<sup>a</sup>, Xiaolin Yu<sup>b</sup> and Lining Sun<sup>a,\*</sup>

\*Corresponding author

<sup>a</sup> Department of Chemistry, College of Sciences, Shanghai University, Shanghai 200444, China. E-mail: [lnsun@shu.edu.cn](mailto:lnsun@shu.edu.cn)

<sup>b</sup> Nikolaev Institute of Inorganic Chemistry, Siberian Branch of the Russian Academy of Sciences, 3 Lavrentiev Ave., 630090, Novosibirsk, Russia

## Experimental section

### Chemicals and materials

All the chemicals were used directly without further purification.  $\text{LuCl}_3 \cdot 6\text{H}_2\text{O}$  (99.9%) and  $\text{EuCl}_3 \cdot 6\text{H}_2\text{O}$  (99.9%) were purchased from Sigma-Aldrich Co. Ltd. Formamide ( $\text{CH}_3\text{NO}$ , 99.5%), 4,4'-bipyridine, and Ethanol ( $\text{C}_2\text{H}_6\text{O}$ , 99.7%) were purchased from Aladdin Co. Ltd. Deionized water was prepared in the laboratory and used throughout the experiment.

### Statistical Analysis

Average lifetime ( $\tau_{\text{AVG}}$ ) calculation:

$$\tau_{\text{AVG}} = \frac{\text{Rel}_1\% \times \tau_1^2 + \text{Rel}_2\% \times \tau_2^2}{\text{Rel}_1\% \times \tau_1 + \text{Rel}_2\% \times \tau_2}$$

### Characterization

Single crystal X-ray diffraction data were measured on a Bruker D8 VENTURE DUO PHOTON III system equipped with an Incoatec Ius 3.0 Microfocus sealed tube ( $\text{Cu K}\alpha$ ,  $\lambda = 1.54178 \text{ \AA}$ ) and a Helios MX Multilayer Optic monochromator. The crystal structure was solved and refined using the Olex 2 Software Package. The crystal structures have been deposited at the Cambridge Crystallographic Data Center (CCDC) and allocated the deposition numbers: Lu-MOFs: (CCDC: 2356792). The information is available free of charge from the Website (<http://www.ccdc.cam.ac.uk>).

Powder X-ray diffraction (PXRD) patterns were collected on an 18 KW D/MAX2200 V PC X-ray powder diffractometer. Measurements were taken at room temperature in the  $2\theta$  range of  $5 - 90^\circ$  with a step of  $0.02^\circ$  ( $2\theta$ ) and counting time of 0.2 s/step. The emission spectra were recorded by Edinburgh FS-5 fluorescence spectrometer (using a suitable short-pass filter to exclude the second-order emission from the xenon arc lamp). The scan slit is 0.5. The repeat is 1 and the dwell time is 0.2 s. The lifetime measurements were performed with a microsecond pulsed Xenon lamp and a picosecond pulsed diode laser ( $375 \pm 10 \text{ nm}$ ). Scanning electron microscope (SEM) images, energy dispersive X-ray spectroscopy (EDS) images, and element mapping images were collected on the Apollo 300. Fourier-transform infrared (FT-IR) spectra were recorded by an Avatar 370 instrument with a KBr pellet (spectral ranging from  $4000$  to  $500 \text{ cm}^{-1}$ ). Yielded metal composition ratios were analyzed by inductively

coupled plasma atomic emission spectroscopy (ICP-AES) on PERKINE 7300DV. Optical diffuse reflection spectra were obtained at room temperature by Shimazu UV-3600i UV-visible spectrometer. The wavelength range of data acquisition is 200-1000 nm. Barium sulfate powder is used as the standard (100% reflectivity). Thermogravimetric analysis (TGA) experiments were carried out on NETZSCH STA449 F5 thermal analyzer from room temperature to 800 °C under a nitrogen atmosphere at a heating rate of 10 °C/min. All photos were taken with a digital camera (Nikon, D850).

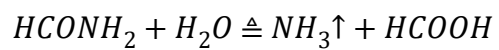

**Fig. S1** Formamide gradually reacts with water to form ammonia and formic acid under heating.

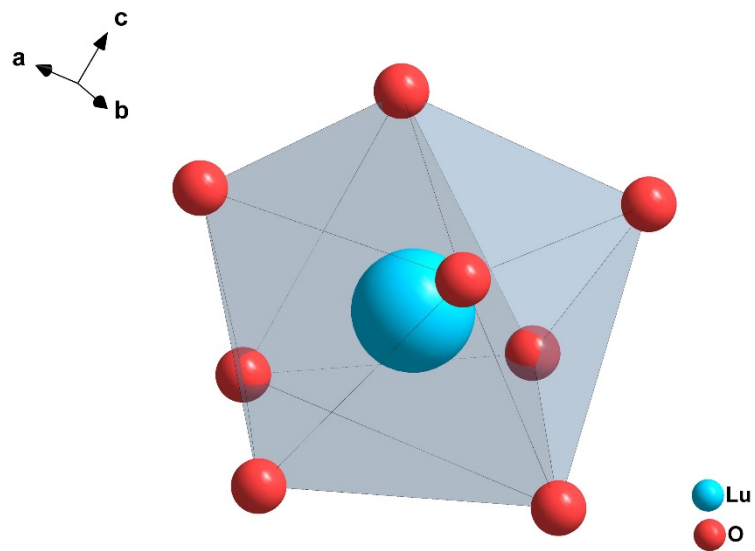

**Fig. S2** Coordination polyhedron representation of Lu-MOFs.

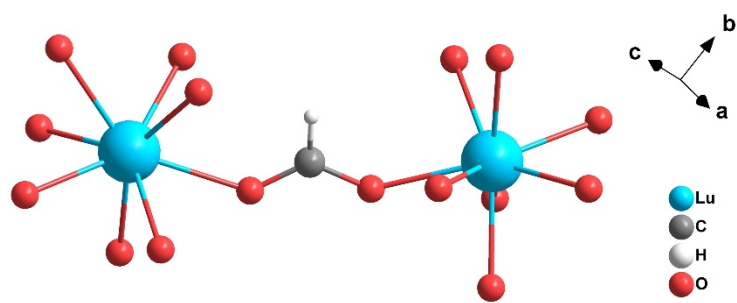

**Fig. S3** The coordination environment and bridging fashion of formic acid ligand in Lu-MOFs.

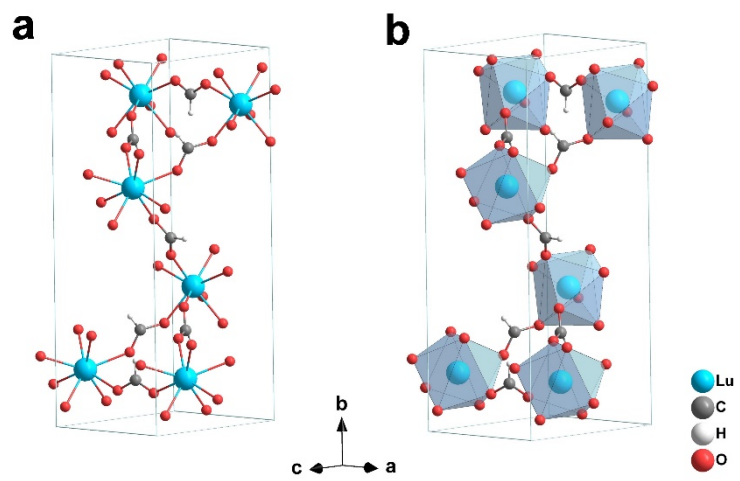

**Fig. S4** A unit cell of Lu-MOFs.

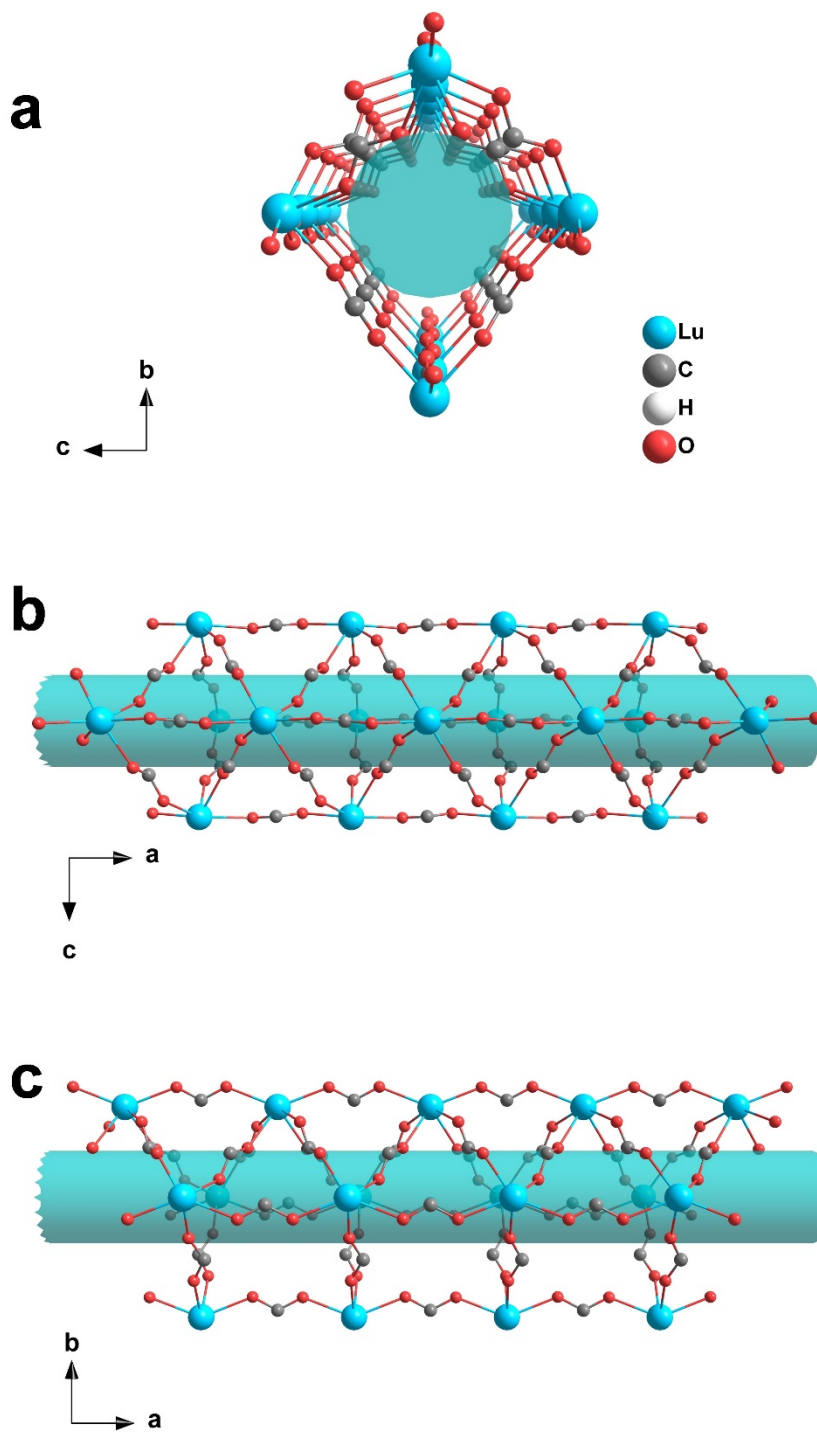

**Fig. S5** Schematic representation of the structure of Lu-MOFs along the crystallographic axis a, b and c, respectively.



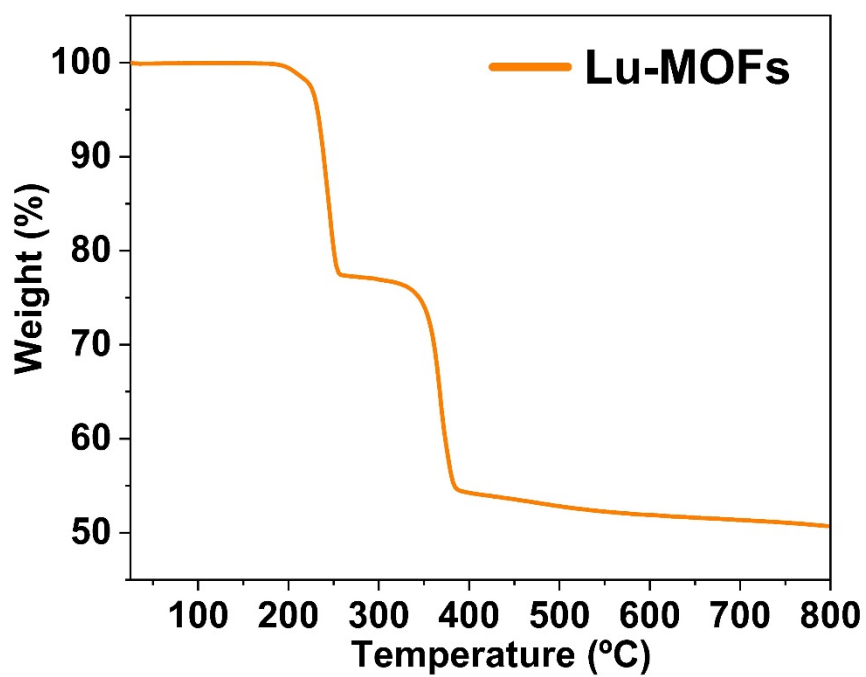

**Fig. S6** Thermogravimetric analysis curve of Lu-MOFs.

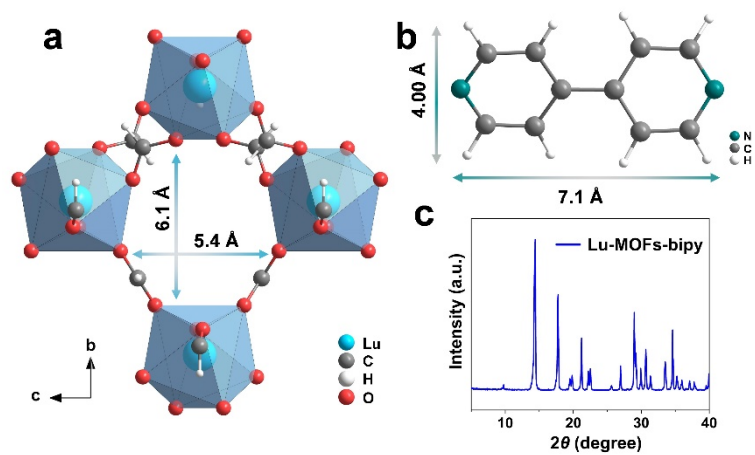

**Fig. S7** (a) Pore size of Lu-MOFs. (b) The chemical structure and size of a 4,4'-bipyridine molecule. (c) Powder X-ray diffraction (PXRD) pattern of Lu-MOFs-bipy.

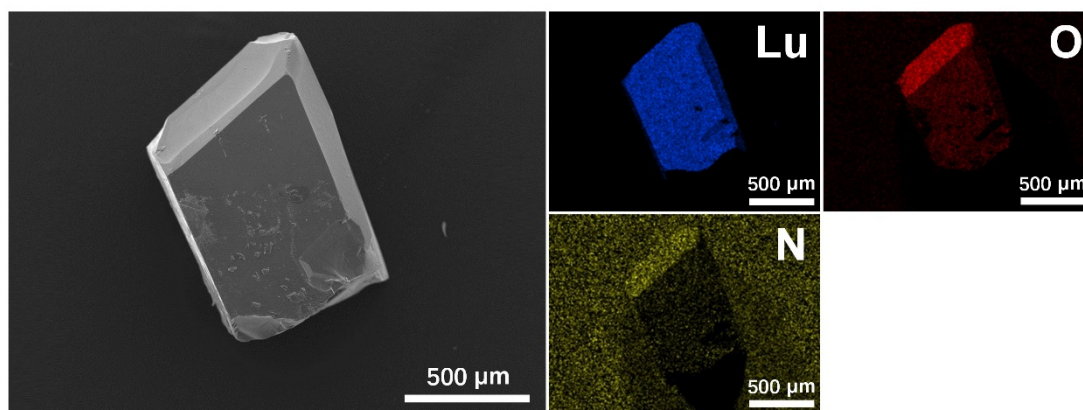

**Fig. S8** Scanning electron microscopy (SEM) image of Lu-MOFs-bipy and energy dispersive X-ray spectroscopic (EDS) mappings of Lu, O, and N elements.

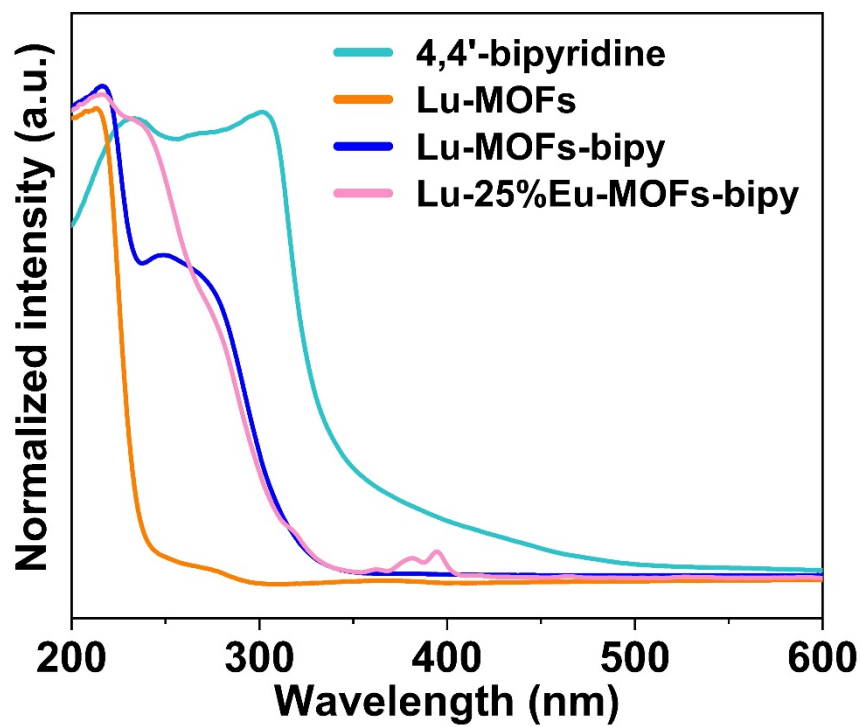

**Fig. S9** UV-vis absorption spectra of 4,4'-bipyridine, Lu-MOFs, Lu-MOFs-bipy and Lu-25%Eu-MOFs-bipy in solid state.

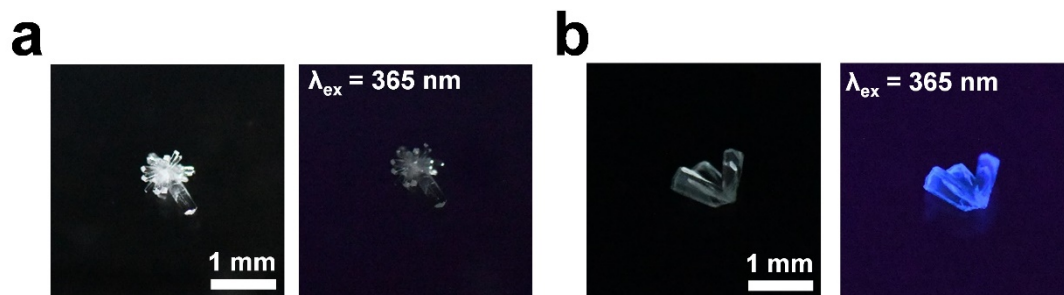

**Fig. S10** Photographs of (a) Lu-MOFs crystal and (b) Lu-MOFs-bipy crystal under natural light and 365 nm excitation.

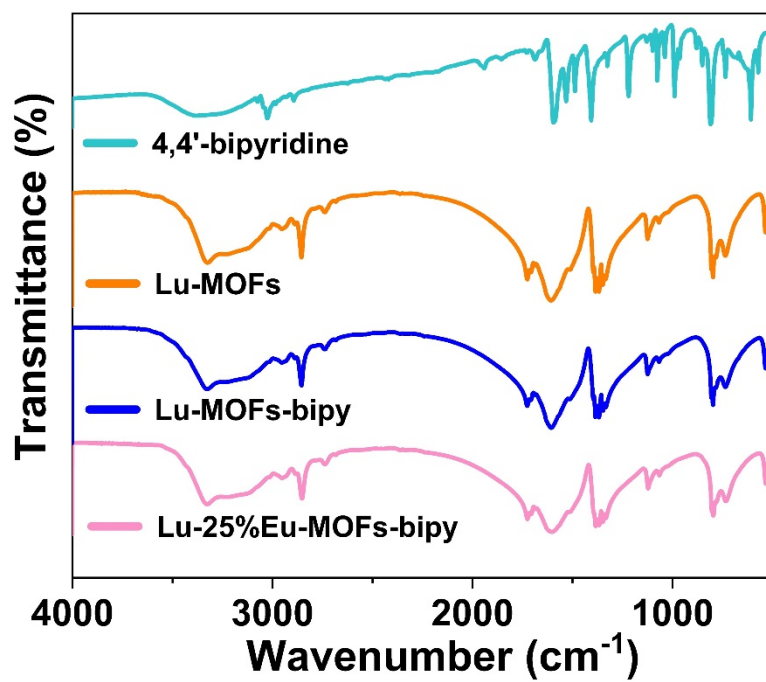

**Fig. S11** Fourier-transform infrared (FT-IR) spectra of 4,4'-bipyridine, Lu-MOFs, Lu-MOFs-bipy, and Lu-25%Eu-MOFs-bipy.

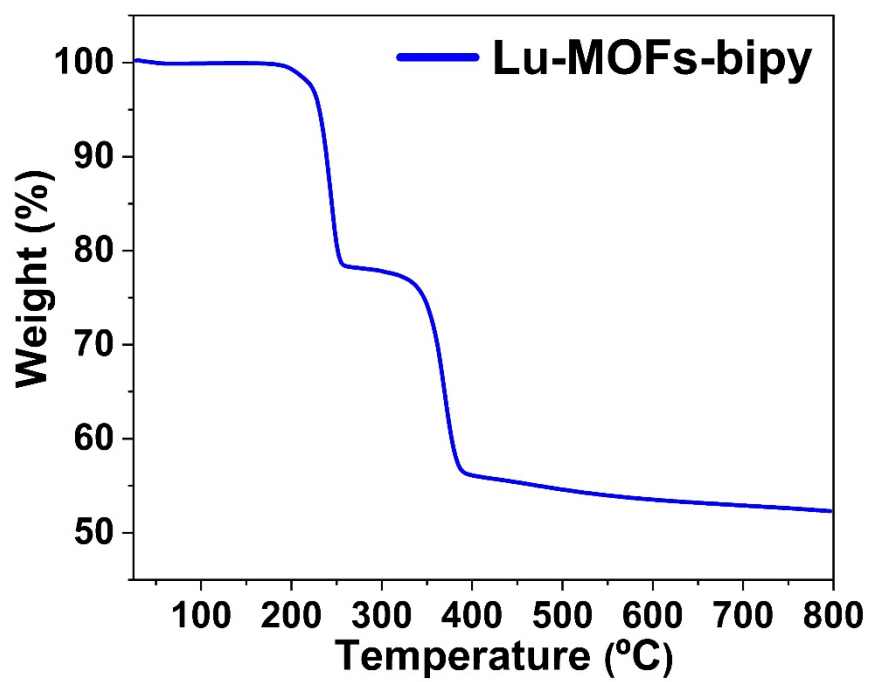

**Fig. S12** Thermogravimetric analysis curve of Lu-MOFs-bipy.

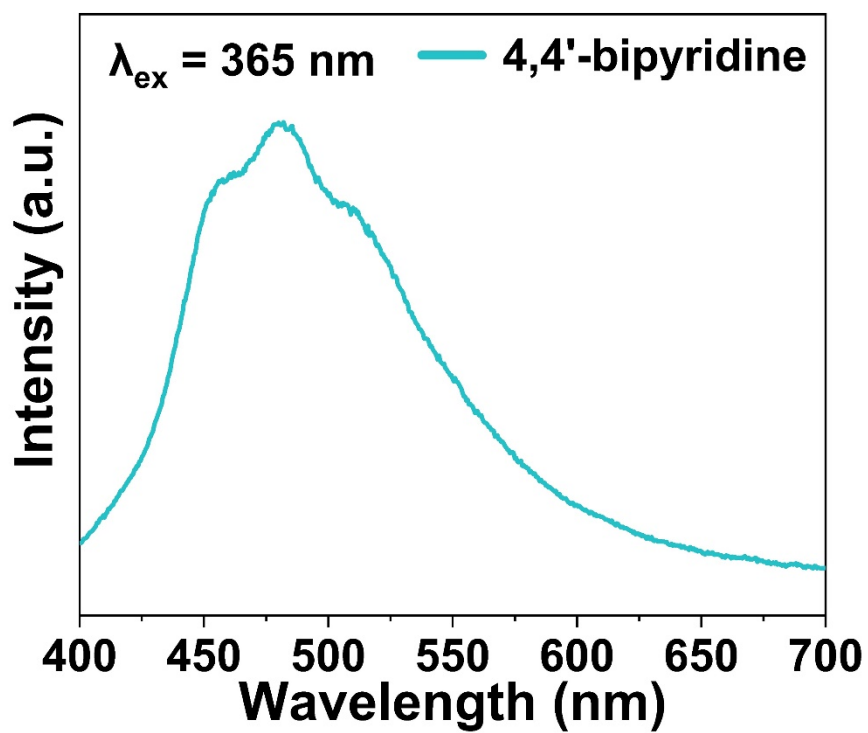

**Fig. S13** The solid-state emission spectrum of 4,4'-bipyridine at room temperature under 365 nm excitation



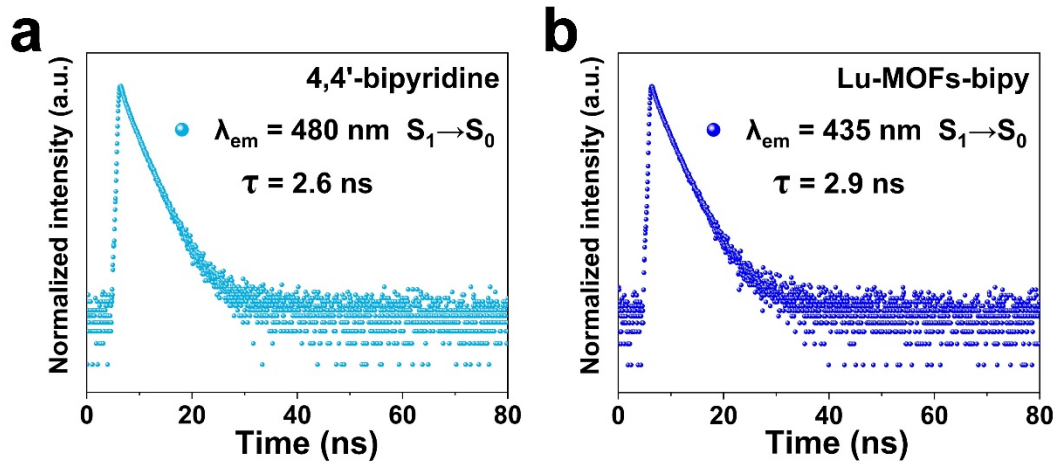

**Fig. S14** Decay curves of emissions at 480 nm for 4,4'-bipyridine and at 435 nm for Lu-MOFs-bipy under pulsed excitation of 375 nm.

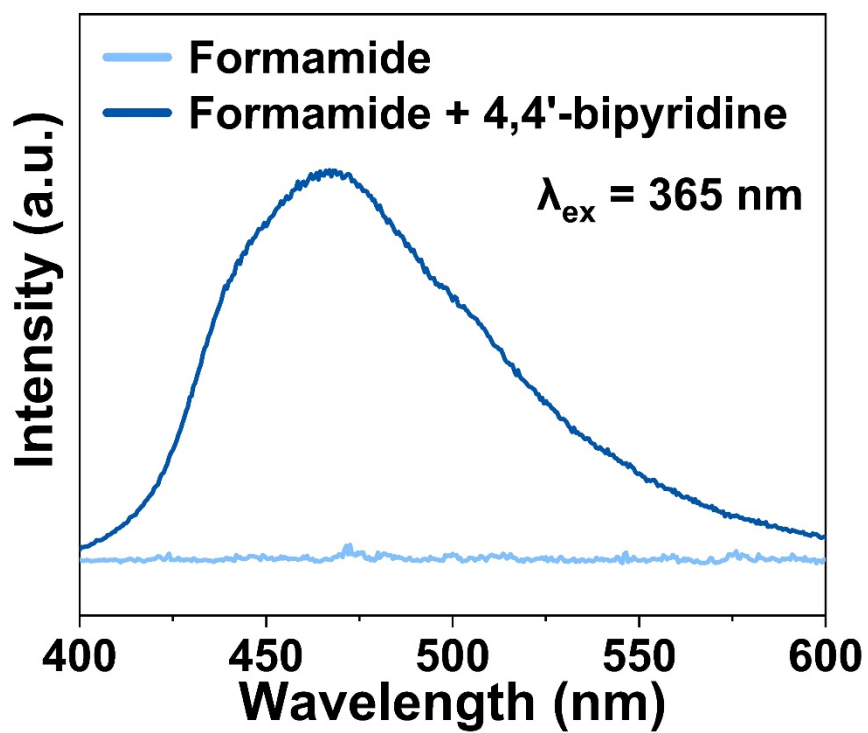

**Fig. S15** The fluorescence spectra of formamide and 0.5 mmol 4,4'-bipyridine dissolved in 2 mL formamide.

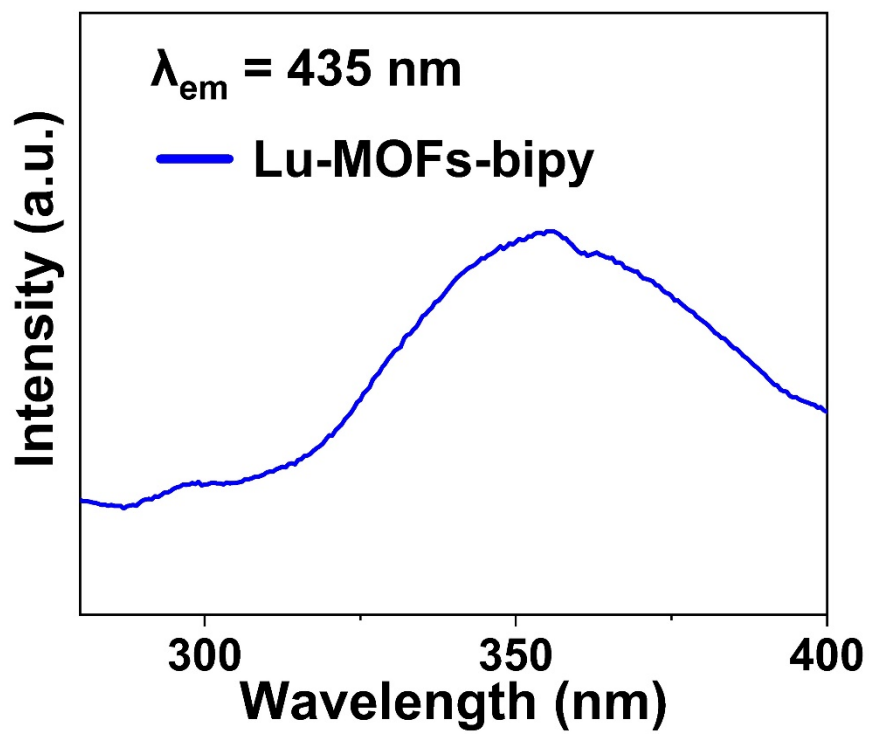

**Fig. S16** Excitation spectrum of Lu-MOFs-bipy in solid state.

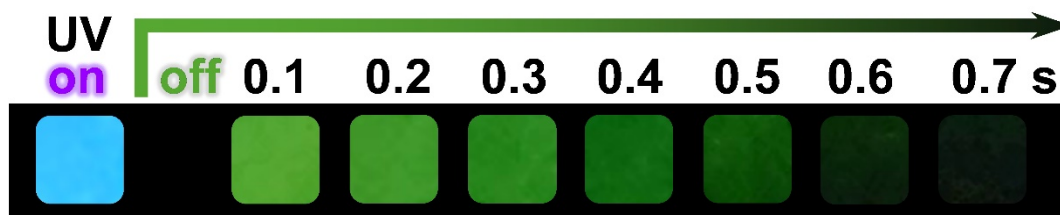

**Fig. S17** Photographs of Lu-MOFs-bipy taken under 365 nm irradiation (UV on) and at different time intervals after removal of UV irradiation (UV off).

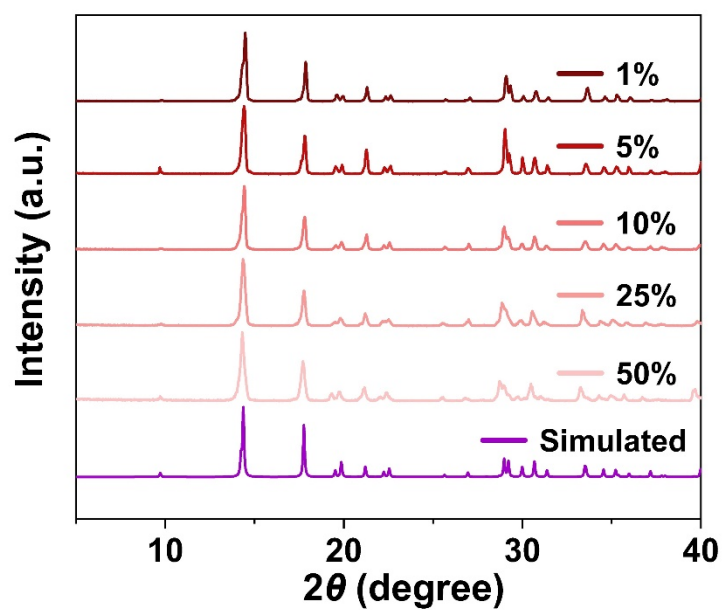

**Fig. S18** PXRD patterns of Lu- $x$ %Eu-MOFs-bipy ( $x = 1, 5, 10, 25$  and  $50$ ), and simulated pattern of Lu-MOFs.

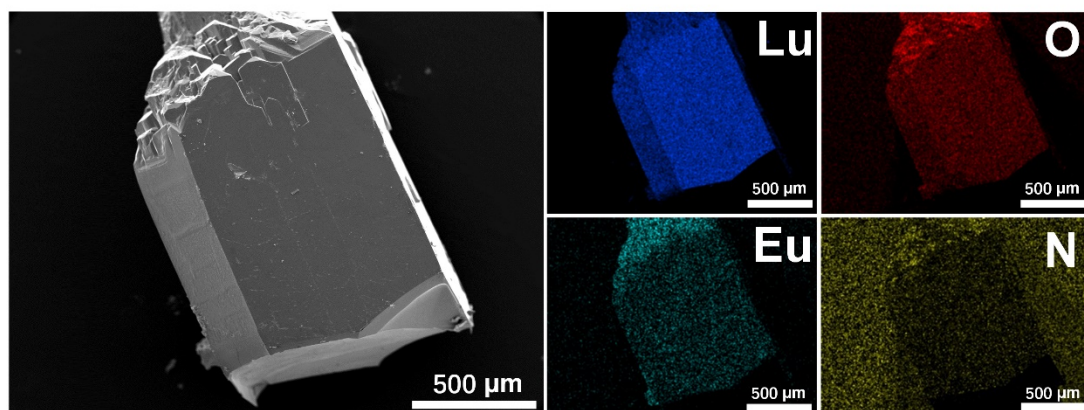

**Fig. S19** SEM image of Lu-25%Eu-MOFs-bipy and EDS mappings of Lu, O, Eu, and N elements.

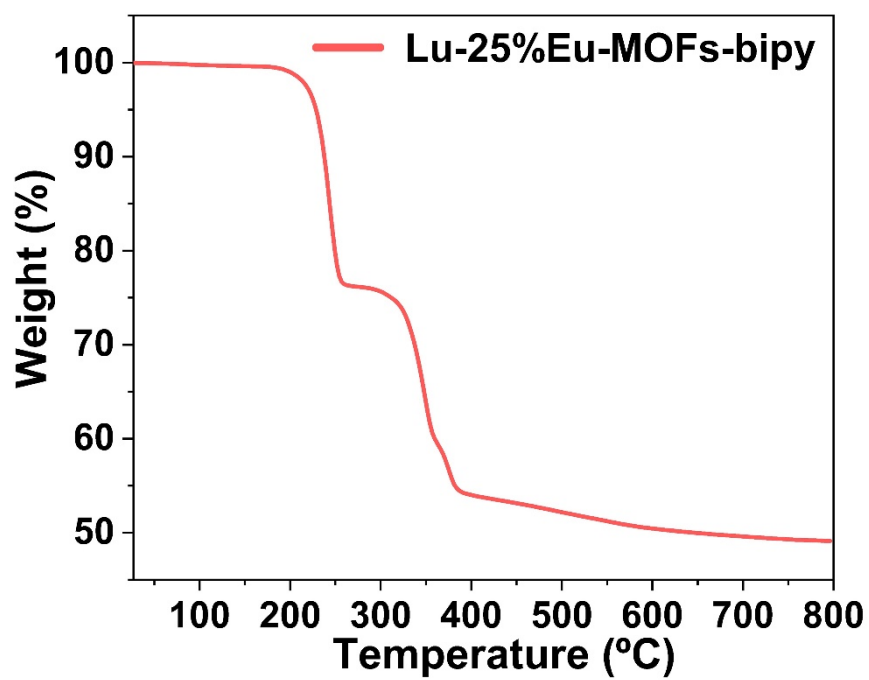

**Fig. S20** Thermogravimetric analysis curve of Lu-25%Eu-MOFs-bipy.

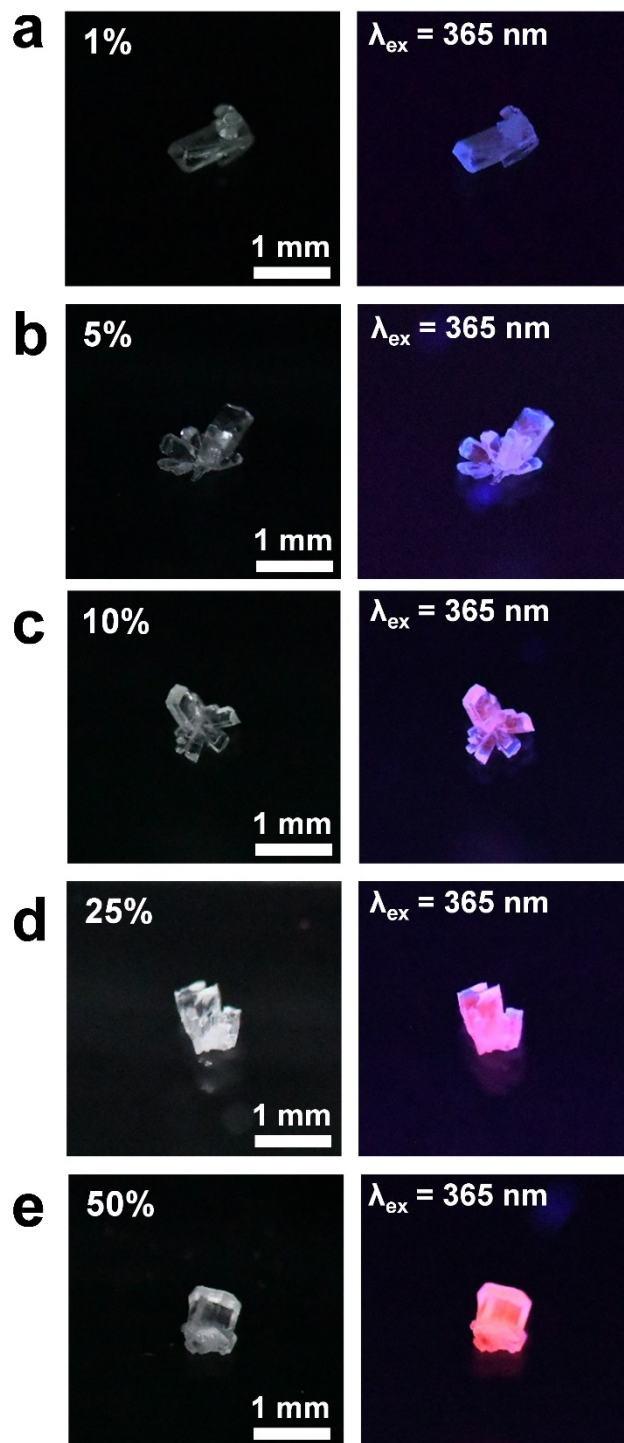

**Fig. S21** Photographs of Lu- $x$ %Eu-MOFs-bipy crystals under natural light and 365 nm excitation, respectively, taken with an optical camera.  $x = 1$  (a), 5 (b), 10 (c), 25 (d), and 50 (e).



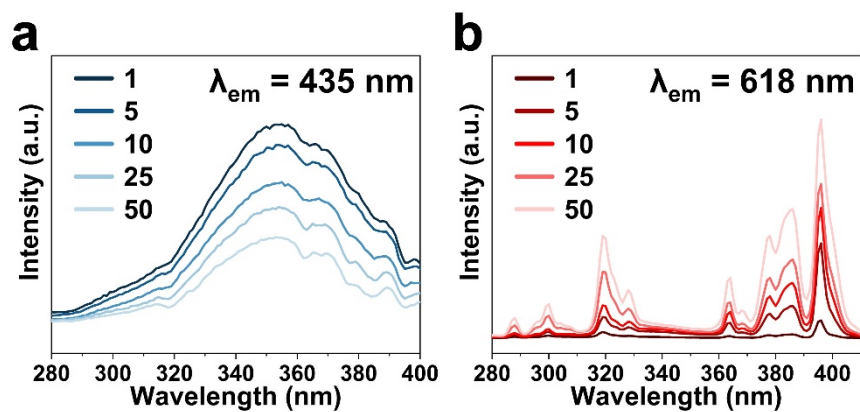

**Fig. S22** Excitation spectra of Lu-*x*%Eu-MOFs-bipy (*x* = 1, 5, 10, 25, and 50) in the solid state monitored at 435 nm (a) and 618 nm (b), respectively.

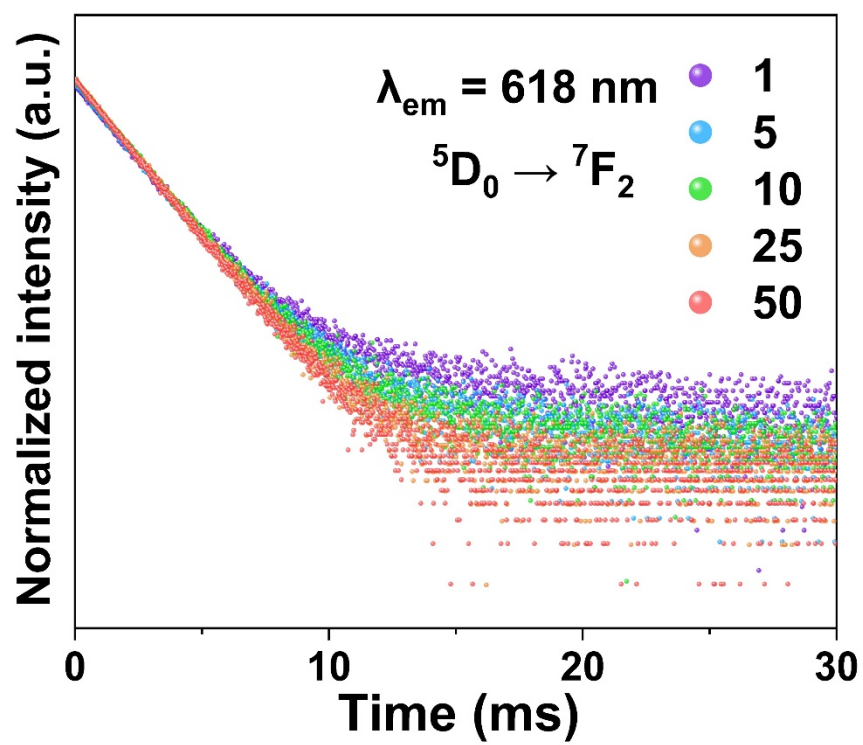

**Fig. S23** Decay curves of the phosphorescence detected at 618 nm for Lu- $x$ %Eu-MOFs-bipy ( $x = 1, 5, 10, 25,$  and  $50$ ) under pulsed excitations of 365 nm.

**Table S1.** Crystal structure data for Lu-MOFs crystal.

|                      |                                                                                         |
|----------------------|-----------------------------------------------------------------------------------------|
| Chemical Formula     | C <sub>5</sub> H <sub>5</sub> O <sub>10</sub> Lu                                        |
| Temperature          | 300(2) K                                                                                |
| Weight               | 400.06 g/mol                                                                            |
| Crystal size         | 0.050x 0.050 x 0.100 mm                                                                 |
| Crystal system       | orthorhombic                                                                            |
| Space group          | C 2 2 2 <sub>1</sub>                                                                    |
| Unit cell dimensions | a = 6.6112(3) Å<br>b = 18.1762(9) Å<br>c = 8.3723(4) Å<br>α = 90°<br>β = 90°<br>γ = 90° |
| Unit cell volume     | 1006.07(8)                                                                              |
| Z                    | 4                                                                                       |
| Density (calculated) | 2.641 g cm <sup>-3</sup>                                                                |

**Table S2.** Lu and Eu elements analyses of Lu- $x$ %Eu-MOFs-bipy ( $x = 1, 5, 10, 25,$  and  $50$ ) by inductively coupled plasma atomic emission spectroscopy (ICP-AES).

| <b>Compound</b>    | <b>Molar ratio (%)</b> |           |
|--------------------|------------------------|-----------|
|                    | <b>Lu</b>              | <b>Eu</b> |
| Lu-1%Eu-MOFs-bipy  | 98.91                  | 1.09      |
| Lu-5%Eu-MOFs-bipy  | 94.49                  | 5.51      |
| Lu-10%Eu-MOFs-bipy | 89.05                  | 10.95     |
| Lu-25%Eu-MOFs-bipy | 72.94                  | 27.06     |
| Lu-50%Eu-MOFs-bipy | 51.52                  | 48.48     |

**Table S3.** Fitting parameters for single exponential decay of Lu-*x*%Eu-MOFs-bipy (*x* = 1, 5, 10, 25, and 50) emitting at 435 nm (4,4'-bipyridine), 545 nm (4,4'-bipyridine), and 618 nm (Eu<sup>3+</sup>) under a picosecond pulsed diode laser (375 ± 10 nm) and a microsecond pulsed Xenon lamp (365 nm) excitation, respectively.

| <b>Eu<sup>3+</sup> content</b> | <b>λ<sub>ex</sub> = 375 nm</b> | <b>λ<sub>ex</sub> = 365 nm</b> |                                |
|--------------------------------|--------------------------------|--------------------------------|--------------------------------|
|                                | <b>λ<sub>em</sub> = 435 nm</b> | <b>λ<sub>em</sub> = 545 nm</b> | <b>λ<sub>em</sub> = 618 nm</b> |
| 1%                             | 2.8 ns                         | 108.0 ms                       | 4.7 ms                         |
| 5%                             | 2.8 ns                         | 101.8 ms                       | 3.0 ms                         |
| 10%                            | 2.7 ns                         | 99.2 ms                        | 2.4 ms                         |
| 25%                            | 2.6 ns                         | 88.4 ms                        | 2.0 ms                         |
| 50%                            | 2.5 ns                         | 86.8 ms                        | 1.9 ms                         |
